# Supplementary material for: Distinctive Physio-Biochemical Properties and Transcriptional Changes Unfold the Mungbean Cultivars Differing by Their Response to Drought Stress at Flowering Stage
Source: MDPI journal article supplement (doi:10.3390/horticulturae8050424), 2022-05-10
Supplement: s1 [file s1]

**Table S1. Details of primers used for quantitative real-time PCR (qRT-PCR) analysis**

| S.No | Gene annotation details                                                       | Primer ID                           | Primer sequence (5'→3')                              | LOC number   |
|------|-------------------------------------------------------------------------------|-------------------------------------|------------------------------------------------------|--------------|
| 1    | Photosystem II oxygen evolving complex protein ( <i>PS II-PsbP</i> )          | <i>VrPS II-PsbP<sup>a</sup></i>     | F: TAGACAAGGAAGGCGCCAAG<br>R: TGCCACCCAAAAGGGTAGAG   | LOC106758773 |
| 2    | Photosystem II, Chlorophyll A-B binding protein ( <i>PS II-LHCB</i> )         | <i>VrPS II-LHCB<sup>a</sup></i>     | F: CTGCTGGGAGCTATTGGAGG<br>R: CGACCTGAACCGAGACCAAG   | LOC106759760 |
| 3    | Photosystem I PsaG/PsaK ( <i>PS I- PsaG/PsaK</i> )                            | <i>VrPS I-PsaG/PsaK<sup>a</sup></i> | F: TGAAC TCAACTCGGCCCTTG<br>R: CACTTGCTTTGCCACGTTCT  | LOC106762387 |
| 4    | Phosphoenolpyruvate carboxylase 3 ( <i>PEPC 3</i> )                           | <i>VrPEPC 3<sup>a</sup></i>         | F: TGCTTCAAAAGCATGCAAGGA<br>R: GTGTTGGAGGGGTCCTCTTG  | LOC106760805 |
| 5    | Superoxide dismutase 2 ( <i>SOD 2</i> )                                       | <i>VrSOD 2<sup>a</sup></i>          | F: CATGCATTCTTG CATGGAACC<br>R: AAGCCATGCCCATCCTGAAC | LOC106770847 |
| 6    | Peroxidase superfamily protein ( <i>POD</i> )                                 | <i>VrPOD<sup>a</sup></i>            | F: CCCAGACGAAGGAGATCGTG<br>R: CCTTTCCCTTGACGGTTGGT   | LOC106768540 |
| 7    | Catalase-2 ( <i>CAT 2</i> )                                                   | <i>VrCAT 2<sup>a</sup></i>          | F: GCCTAGATGGGAAGCGTGAA<br>R: CAGATGCTGCGGATTTCGTG   | LOC106764998 |
| 8    | Heat Shock Protein-90 ( <i>HSP-90</i> )                                       | <i>VrHSP-90<sup>a</sup></i>         | F: GGTGAGTGAGAAGGACACCC<br>R: TATCTCTCGGCTGGTGTGGA   | LOC106764678 |
| 9    | Abscisic acid responsive elements-binding factor 2 ( <i>ABF2</i> )            | <i>VrABF2<sup>a</sup></i>           | F: CAGCTGGTACAGGAGAAGGC<br>R: TTGGCCCCACCACTTTCTTT   | LOC106769302 |
| 10   | Dehydration responsive element binding transcription factor ( <i>DREB2C</i> ) | <i>VrDREB2C<sup>a</sup></i>         | F: GATCAACTCGGAAGGCACCA<br>R: TGGCTCCCTAATCTCACCCA   | LOC106764035 |
| 11   | NAC transcription factor 1 ( <i>NAC 3</i> )                                   | <i>VrNAC 3<sup>a</sup></i>          | F: GTCCCTTCTGTACCGCCATT<br>R: CCAAACGTTTCGTTGGAGCC   | LOC106753951 |
| 12   | Actin                                                                         | <i>VrActin<sup>b</sup></i>          | F: CAGTGTCTGGATTGGAGGCT<br>R: GTCCTCGACCACTTGATG     | LOC106757568 |

Note: Primers from <sup>a</sup>Current study and <sup>b</sup>Li et al. [61]
